# Supplementary material
Source: PubMed Central journal article supplement (PMC4664120)
Supplement: supp_WNL.0000000000002185_Table_e-1.pdf [file supp_WNL.0000000000002185_Table_e-1.pdf]

**Supplementary Table e-1:** Results of Congenital Myasthenic Syndrome rating scale performed in patients with *SYT2* mutation

| <i>Examined Parameters / Scores</i>                                                                |                                                                  | <i>Patient II.2 (44 y female)</i> |                               |                               | <i>Patient III.2 (27y female)</i> |                               |                               |
|----------------------------------------------------------------------------------------------------|------------------------------------------------------------------|-----------------------------------|-------------------------------|-------------------------------|-----------------------------------|-------------------------------|-------------------------------|
|                                                                                                    |                                                                  | <b>Initial Visit</b>              | <b>1 month on<br/>3,4 DAP</b> | <b>2 weeks<br/>NO 3,4 DAP</b> | <b>Initial Visit</b>              | <b>1 month on<br/>3,4 DAP</b> | <b>2 weeks<br/>NO 3,4 DAP</b> |
| <b>Swallowing ability</b> / 0-9 (Texture of food (0-3), Meal time (0-3), Swallowing/choking (0-3)) |                                                                  | 0/9                               | 0/9                           | 0/9                           | 0/9                               | 0/9                           | 0/9                           |
| <b>Respiratory function</b> / Forced Vital Capacity (FVC)                                          | Sitting FVC / Predicted %                                        | 3.87 / 112%                       | 3.78 / 113%                   | 3.63/ 109%                    | 3.64 / 99%                        | not performed                 | 3.60 / 98%                    |
|                                                                                                    | Supine FVC / Predicted %                                         | not performed                     | not performed                 | 3.16/ 95%                     | not performed                     | not performed                 | 3.07/ 83%                     |
| <b>Oculomotor weakness</b>                                                                         | Double vision R/L eye / Lateral gaze 1 minute test               | 1 min/ 1 min                      | 1 min/ 1 min                  | 1 min/58sec                   | 28 sec/<br>26 sec                 | 1 min/ 1 min                  | 12.3 sec/<br>15.8 sec         |
|                                                                                                    | Ptosis / Upward gaze 1 minute test                               | 1 min                             | 1 min                         | 1 min                         | 45 sec increased blinking         | 1 min                         | 1 min                         |
|                                                                                                    | Eyelid closure / 0-3                                             | 0                                 | 0                             | 0                             | 0                                 | 0                             | 0                             |
| <b>Bulbar motor weakness</b>                                                                       | Oro-facial motor function/ Timed slurp test                      | 6:30 sec                          | 5:39 sec                      | 6:10 sec                      | 11:36 sec                         | 7:20 sec                      | 9:87 sec                      |
|                                                                                                    | Speech weakness/ Count up to 50                                  | no change                         | no change                     | no change                     | no change                         | no change                     | no change                     |
| <b>General and limb muscle weakness</b>                                                            | Rise from floor / time                                           | unable                            | 9:09 sec with chair support   | 7:51 sec with chair support   | unable                            | unable                        | 5:47 sec                      |
|                                                                                                    | Sustained arm raise / 4 minute abduction at 90°                  | 4 min                             | 4 min                         | 4 min                         | 4 min                             | not performed                 | 4 min                         |
|                                                                                                    | Sustained head raise /2 minute supine head flexion at 45°        | 43 sec                            | 2 min                         | 1:38 min                      | 1:30 min                          | 2 min                         | 1:58 min                      |
|                                                                                                    | Sustained leg raise / 1:40 minute supine hip-knee flexion at 45° | 1:40 min                          | 1:40 min                      | 1:40 min                      | 1:34 min                          | 1:40 min                      | 1:38 min                      |
|                                                                                                    | Squats / number in 1 minute                                      | unable                            | unable                        | unable                        | unable                            | unable                        | unable                        |
|                                                                                                    | Repeated sit to stand / number in 1 minute                       | unable                            | 9                             | 13                            | unable                            | not performed                 | 16                            |
|                                                                                                    | Repeated rise from floor / time                                  | unable                            | 9:69 sec with chair support   | 10:62 with chair support      | unable                            | 5:00 sec with hand support    | 5:45 sec                      |
